# Supplementary material
Source: PubMed Central journal article supplement (PMC5909718)
Supplement: NIHMS932576-supplement-Author_COA_forms.pdf [file NIHMS932576-supplement-Author_COA_forms.pdf]

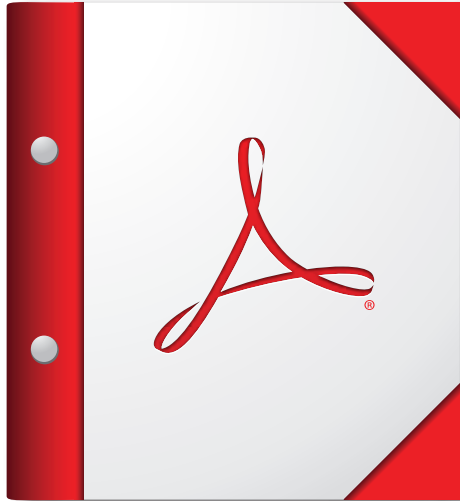

**For the best experience, open this PDF portfolio in  
Acrobat X or Adobe Reader X, or later.**

[Get Adobe Reader Now!](#)
